# Supplementary material
Source: PubMed Central journal article supplement (PMC6052788)
Supplement: NIHMS968332-supplement-supplement_1.pdf [file NIHMS968332-supplement-supplement_1.pdf]

## Online Appendix

### Methods

#### Assessments of lifestyle factors

At baseline and every 2-4 years thereafter, a validated semi-quantitative FFQ with approximately 131 food items (1-3) was administered to collect and update dietary information. The FFQ was designed to measure the usual diet consumed over the past year. Nutrient intake was computed by multiplying the frequency of consumption of a food with a pre-specified portion size by its nutrient content and summing this value across all relevant food items (1). Information on smoking status and body weight was obtained from biennial follow-up questionnaire. The accuracy of self-reported body weight was validated in a random subset of participants in the NHS (N=140) and HPFS (n=123) (4). The Spearman correlation coefficient between self-reported and measured body weight was 0.97 for both cohorts (4). BMI was calculated as self-reported weight in kilograms divided by the square of height in meters ( $\text{kg/m}^2$ ). Alcohol consumption was assessed using the FFQs, based on questions for daily consumption of beer, wine, and spirits during the past year (5). Information on the average time per week participants spent on leisure-time physical activities, including walking or hiking outdoors, running, jogging, bicycling, tennis/squash/racquetball, lap swimming, and calisthenics/aerobics/rowing machine exercise was updated every two years using a validated questionnaire (6). In addition, information on potential confounders, including age, ethnicity, menopausal status and use of postmenopausal hormones (women only), use of multivitamins, use of aspirin, family history of diabetes or myocardial infarction (MI), presence or absence of hypertension or hypercholesterolemia, and medication use (such as insulin, antihypertensive drug, or cholesterol-lowering medication) was obtained via biennial questionnaires. In addition, we also asked

diabetic patients to report recent hemoglobin A1c (HbA1c) levels in supplementary questionnaires administered in 2000 and 2005 in the NHS and 2000, 2004, and 2008 in the HPFS.

### **Ascertainment of T2D**

The National Diabetes Data Group criteria were applied to ascertain T2D diagnosis before 1998:

1) fasting glucose levels  $\geq 126$  mmol/l, blood glucose  $\geq 200$  mmol/l during an oral glucose tolerance test, or random blood glucose  $\geq 200$  mmol/l, together with one or more diabetes-related symptoms (weight loss, polyuria, excessive thirst, or hunger); 2) elevated glucose levels on more than one occasion in the absence of symptoms; or 3) treatment with hypoglycemic medication (insulin or an oral hypoglycemic agent) (7). Since 1998, the diagnosis criterion of fasting glucose was lowered to 7.0 mmol/l by ADA criteria. After 2010, HbA1c  $\geq 6.5\%$  was further included in the diagnosis criteria (8).

### **Reference:**

1. Hu FB, Manson JE, Stampfer MJ, et al. Diet, lifestyle, and the risk of type 2 diabetes mellitus in women. *N Engl J Med* 2001;345:790-797
2. Willett WC, Sampson L, Stampfer MJ, et al. Reproducibility and validity of a semiquantitative food frequency questionnaire. *Am J Epidemiol* 1985;122:51-65
3. Rimm EB, Giovannucci EL, Stampfer MJ, Colditz GA, Litin LB, Willett WC. Reproducibility and validity of an expanded self-administered semiquantitative food frequency questionnaire among male health professionals. *Am J Epidemiol* 1992;135:1114-1126; discussion 1127-1136
4. Rimm EB, Stampfer MJ, Colditz GA, Chute CG, Litin LB, Willett WC. Validity of self-reported waist and hip circumferences in men and women. *Epidemiology* 1990;1:466-473
5. Rimm EB, Giovannucci EL, Willett WC, et al. Prospective study of alcohol consumption and risk of coronary disease in men. *Lancet* 1991;338:464-468
6. Wolf AM, Hunter DJ, Colditz GA, et al. Reproducibility and validity of a self-administered physical activity questionnaire. *Int J Epidemiol* 1994;23:991-999
7. Classification and diagnosis of diabetes mellitus and other categories of glucose intolerance. National Diabetes Data Group. *Diabetes* 1979;28:1039-1057
8. Standards of medical care in diabetes--2010. *Diabetes Care* 2010;33 Suppl 1:S11-61

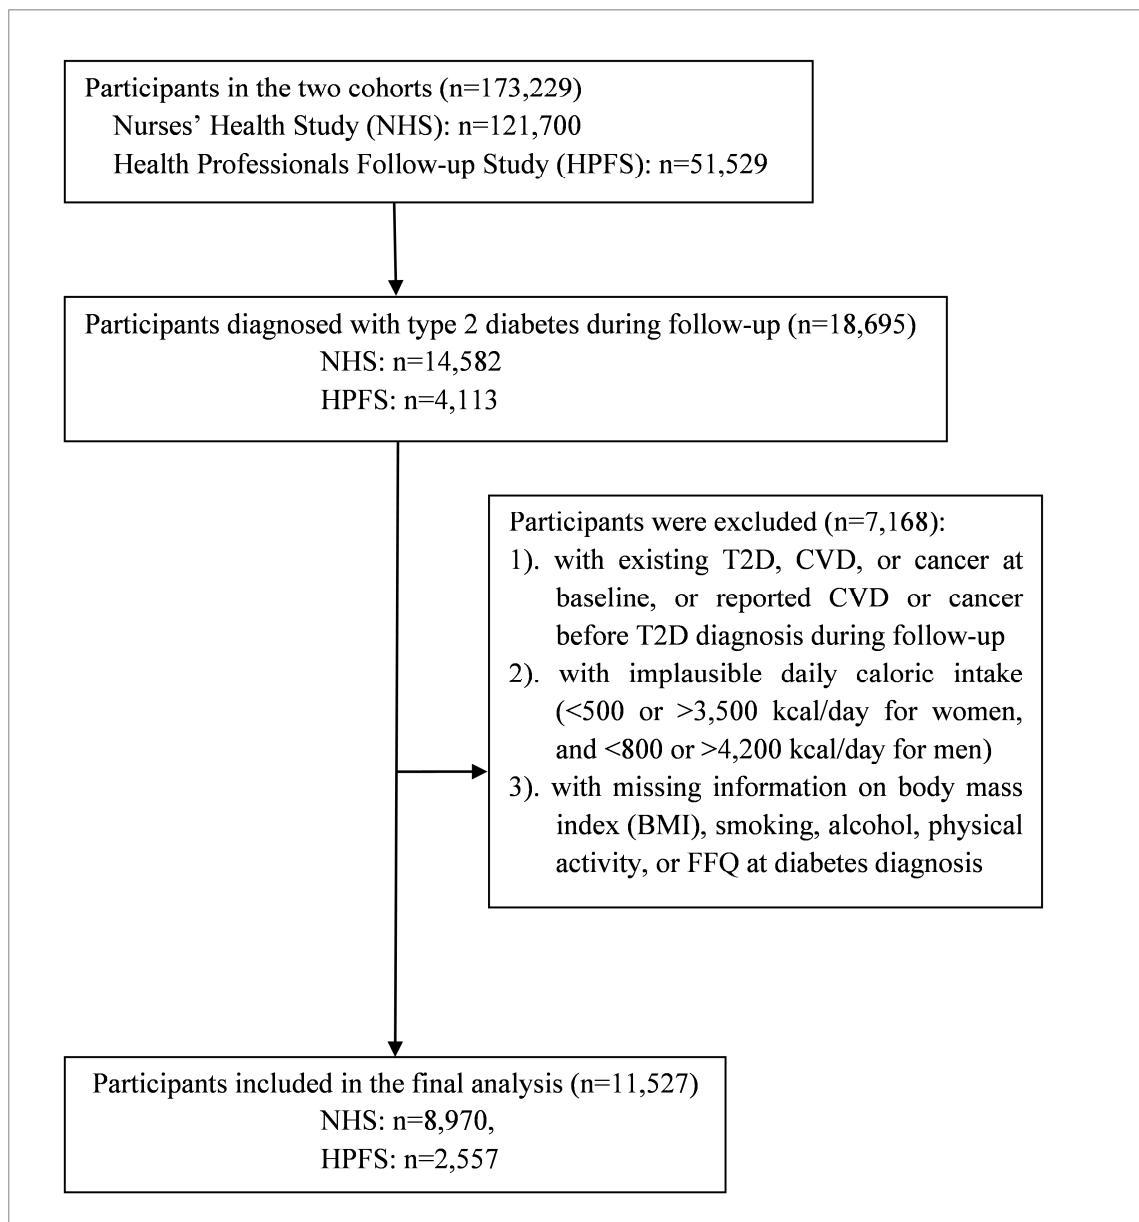

**Online Figure 1.** Flowchart of participants included in the analysis.

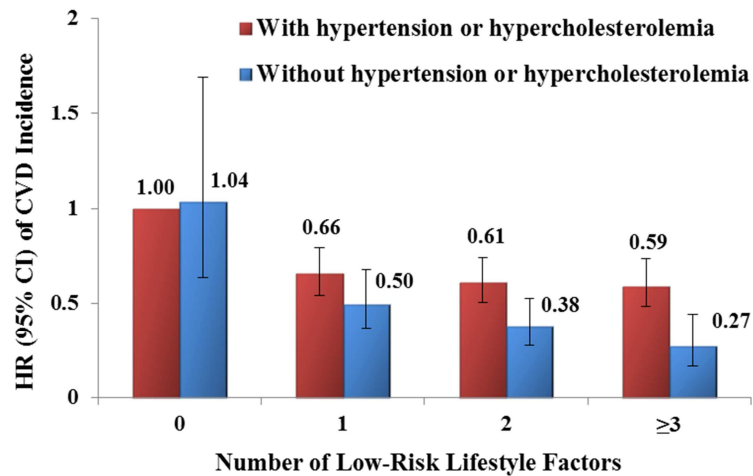

**A**

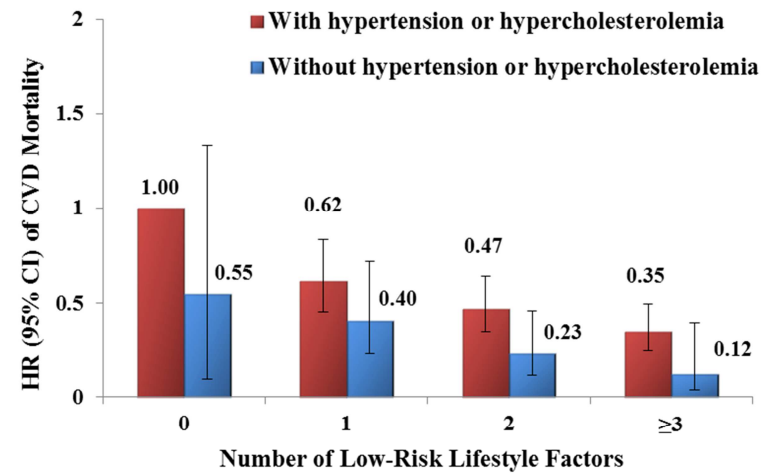

**B**

**Online Figure 2.** Hazard ratio (95% CI) of CVD incidence (A) and CVD mortality (B) according to number of low-risk lifestyle factors\* among diabetic patients with and without hypertension and/or hypercholesterolemia†

\* Low-risk lifestyle factors: non-smoking, moderate to vigorous physical activity ( $\geq 150$  min/week), high quality diet (top two fifths of Alternative Healthy Eating Index), and moderate alcohol consumption (5-15 g/day for women and 5-30 g/day for men).

† Adjusted for age (years), sex (men or women), ethnicity (Caucasian, African American, Hispanic, or Asian), body mass index at diabetes diagnosis ( $<25.0$ ,  $25.0-29.9$ ,  $30.0-34.9$ ,  $\geq 35.0$  kg/m<sup>2</sup>), menopausal status (women only), family history of diabetes (yes/no), family history of myocardial infarction (yes/no), current aspirin use (yes/no), current multivitamin use (yes/no), and diabetes duration (years).

**Online Table 1.** Hazard ratio (95% CI) of CVD, CHD, and stroke incidence according to individual and combined lifestyle factors after diabetes diagnosis with further adjustment of presence of hypertension or hypercholesterolemia and medication use \*

|                                                     | Person<br>Years | CVD Incidence |                  | CHD Incidence |                  | Stroke Incidence |                  |
|-----------------------------------------------------|-----------------|---------------|------------------|---------------|------------------|------------------|------------------|
|                                                     |                 | Cases         | HR† (95% CI)     | Cases         | HR† (95% CI)     | Cases            | HR† (95% CI)     |
| <b>Cigarette smoking</b>                            |                 |               |                  |               |                  |                  |                  |
| Never                                               | 66079           | 902           | 1.00 (ref)       | 696           | 1.00 (ref)       | 217              | 1.00 (ref)       |
| Past                                                | 72009           | 1108          | 1.07 (0.98-1.17) | 917           | 1.12 (1.01-1.24) | 207              | 0.91 (0.75-1.10) |
| Current 1-14<br>cigarettes/day                      | 5669            | 124           | 1.79 (1.48-2.17) | 94            | 1.75 (1.40-2.18) | 31               | 1.94 (1.32-2.85) |
| Current ≥15<br>cigarettes/day                       | 7209            | 177           | 2.10 (1.78-2.49) | 137           | 2.10 (1.73-2.55) | 43               | 2.12 (1.49-3.01) |
| <b>Alcohol consumption (g/day)</b>                  |                 |               |                  |               |                  |                  |                  |
| 0                                                   | 81615           | 1286          | 1.00 (ref)       | 1015          | 1.00 (ref)       | 288              | 1.00 (ref)       |
| 1.0-4.9                                             | 37982           | 533           | 0.89 (0.80-0.99) | 423           | 0.86 (0.77-0.97) | 116              | 0.99 (0.79-1.24) |
| 5.0-14.9                                            | 18333           | 304           | 0.93 (0.81-1.06) | 249           | 0.91 (0.78-1.06) | 61               | 1.06 (0.79-1.42) |
| ≥15.0                                               | 13035           | 188           | 0.72 (0.61-0.85) | 157           | 0.70 (0.59-0.84) | 33               | 0.77 (0.53-1.13) |
| <b>Physical activity (hours/week)</b>               |                 |               |                  |               |                  |                  |                  |
| 0                                                   | 85436           | 1421          | 1.00 (ref)       | 1112          | 1.00 (ref)       | 326              | 1.00 (ref)       |
| 0.1-0.9                                             | 28895           | 396           | 0.96 (0.85-1.08) | 323           | 0.99 (0.87-1.13) | 78               | 0.84 (0.65-1.09) |
| 1.0-3.4                                             | 14680           | 220           | 1.03 (0.89-1.20) | 183           | 1.07 (0.91-1.25) | 39               | 0.89 (0.63-1.25) |
| ≥3.5                                                | 21955           | 274           | 0.88 (0.77-1.01) | 226           | 0.89 (0.77-1.04) | 55               | 0.88 (0.65-1.20) |
| <b>Alternative healthy eating index (quintiles)</b> |                 |               |                  |               |                  |                  |                  |
| Q 1                                                 | 31223           | 517           | 1.00 (ref)       | 400           | 1.00 (ref)       | 121              | 1.00 (ref)       |
| Q 2                                                 | 30389           | 487           | 0.97 (0.86-1.10) | 397           | 1.02 (0.89-1.17) | 100              | 0.88 (0.67-1.15) |
| Q 3                                                 | 30208           | 437           | 0.89 (0.78-1.01) | 348           | 0.90 (0.78-1.05) | 92               | 0.83 (0.63-1.10) |
| Q 4                                                 | 30604           | 474           | 0.93 (0.82-1.05) | 379           | 0.95 (0.82-1.09) | 101              | 0.90 (0.68-1.18) |
| Q 5                                                 | 28542           | 396           | 0.85 (0.74-0.97) | 320           | 0.87 (0.75-1.02) | 84               | 0.80 (0.60-1.08) |
| <b>Number of low-risk factors ‡</b>                 |                 |               |                  |               |                  |                  |                  |
| None                                                | 6443            | 148           | 1.00 (ref)       | 113           | 1.00 (ref)       | 38               | 1.00 (ref)       |
| One                                                 | 63036           | 987           | 0.61 (0.51-0.73) | 782           | 0.64 (0.52-0.78) | 212              | 0.51 (0.36-0.73) |
| Two                                                 | 56610           | 840           | 0.55 (0.46-0.66) | 658           | 0.56 (0.45-0.68) | 199              | 0.54 (0.38-0.78) |
| Three or more                                       | 24877           | 336           | 0.48 (0.40-0.59) | 291           | 0.53 (0.42-0.66) | 49               | 0.33 (0.21-0.52) |

\* Further adjustment of presence of hypertension or hypercholesterolemia and use of antihypertensive or cholesterol-lowering drugs, based on the model in Table 2.

† Adjusted for age (years), sex (men or women), ethnicity (Caucasian, African American, Hispanic, or Asian), body mass index at diabetes diagnosis (<25.0, 25.0-29.9, 30.0-34.9, ≥35.0 kg/m<sup>2</sup>), menopausal status (women only), family history

of diabetes (yes/no), family history of myocardial infarction (yes/no), current aspirin use (yes/no), current multivitamin use (yes/no), diabetes duration (years), presence of hypertension or hypercholesterolemia (yes/no), and use of antihypertensive or cholesterol-lowering drugs (yes/no). Individual lifestyle factors were mutually adjusted.

‡ Low-risk lifestyle factors: non-smoking, moderate to vigorous physical activity ( $\geq 150$  min/week), high quality diet (top two fifths of Alternative Healthy Eating Index), and moderate alcohol consumption (5-15 g/day for women and 5-30 g/day for men).

**Online Table 2.** Hazard ratio (95% CI) of CVD incidence and mortality according to combined lifestyle factors after diabetes diagnosis with further adjustment of diabetes medication use and HbA1c levels in a subset of participants (n=4,650) \*

|                                     | Person<br>Years | CVD Incidence |                  | CHD Incidence |                  | Stroke Incidence |                  | CVD Mortality |                  |
|-------------------------------------|-----------------|---------------|------------------|---------------|------------------|------------------|------------------|---------------|------------------|
|                                     |                 | Cases         | HR (95% CI)      | Cases         | HR (95% CI)      | Cases            | HR (95% CI)      | Cases         | HR (95% CI)      |
| <b>Number of low-risk factors †</b> |                 |               |                  |               |                  |                  |                  |               |                  |
| None                                | 2582            | 57            | 1.00 (ref)       | 46            | 1.00 (ref)       | 13               | 1.00 (ref)       | 9             | 1.00 (ref)       |
| One                                 | 26427           | 439           | 0.64 (0.48-0.86) | 355           | 0.62 (0.45-0.85) | 87               | 0.62 (0.33-1.15) | 133           | 0.66 (0.33-1.34) |
| Two                                 | 23587           | 398           | 0.62 (0.46-0.83) | 323           | 0.60 (0.44-0.83) | 80               | 0.63 (0.34-1.17) | 107           | 0.58 (0.29-1.17) |
| Three or more                       | 10707           | 156           | 0.51 (0.37-0.70) | 135           | 0.51 (0.36-0.72) | 23               | 0.43 (0.21-0.89) | 38            | 0.47 (0.22-0.99) |

\* Adjusted for age (years), sex (men or women), ethnicity (Caucasian, African American, Hispanic, or Asian), body mass index at diabetes diagnosis (<25.0, 25-29.9, 30.0-34.9,  $\geq 35.0$  kg/m<sup>2</sup>), menopausal status (women only), family history of diabetes (yes/no), family history of myocardial infarction (yes/no), current aspirin use (yes/no), current multivitamin use (yes/no), diabetes duration (years), presence of hypertension or hypercholesterolemia (yes/no), use of antihypertensive or cholesterol-lowering drugs (yes/no), diabetes medication use (oral medication only, insulin use, or others), and HbA1c levels (<7%, 7-7.9%, 8-9.9%, 10-11.9%, and  $\geq 12\%$ ).

† Low-risk lifestyle factors: non-smoking, moderate to vigorous physical activity ( $\geq 150$  min/week), high quality diet (top two fifths of Alternative Healthy Eating Index), and moderate alcohol consumption (5-15 g/day for women and 5-30 g/day for men).

**Online Table 3.** Hazard ratio (95% CI) of CVD incidence and mortality according to individual and combined lifestyle factors after diabetes diagnosis with further inclusion of BMI at diagnosis \*

|                                            | Person<br>Years | CVD Incidence |                          | CHD Incidence |                          | Stroke Incidence |                          | CVD Mortality |                          |
|--------------------------------------------|-----------------|---------------|--------------------------|---------------|--------------------------|------------------|--------------------------|---------------|--------------------------|
|                                            |                 | Cases         | HR <sup>†</sup> (95% CI) | Cases         | HR <sup>†</sup> (95% CI) | Cases            | HR <sup>†</sup> (95% CI) | Cases         | HR <sup>†</sup> (95% CI) |
| <b>BMI at diagnosis (kg/m<sup>2</sup>)</b> |                 |               |                          |               |                          |                  |                          |               |                          |
| <25.0                                      | 24395           | 364           | 1.00 (ref)               | 258           | 1.00 (ref)               | 109              | 1.00 (ref)               | 159           | 1.00 (ref)               |
| 25.0-29.9                                  | 52910           | 880           | 1.12 (0.99-1.27)         | 723           | 1.26 (1.09-1.45)         | 170              | 0.83 (0.65-1.06)         | 294           | 0.92 (0.76-1.12)         |
| 30.0-34.9                                  | 42094           | 647           | 1.14 (1.01-1.31)         | 527           | 1.27 (1.09-1.49)         | 132              | 0.87 (0.67-1.13)         | 232           | 1.10 (0.89-1.36)         |
| ≥35.0                                      | 31567           | 420           | 1.15 (1.00-1.34)         | 336           | 1.25 (1.05-1.49)         | 87               | 0.92 (0.68-1.25)         | 173           | 1.32 (1.05-1.66)         |
| <b>Cigarette smoking</b>                   |                 |               |                          |               |                          |                  |                          |               |                          |
| Never                                      | 66079           | 902           | 1.00 (ref)               | 696           | 1.00 (ref)               | 217              | 1.00 (ref)               | 320           | 1.00 (ref)               |
| Past                                       | 72009           | 1108          | 1.09 (0.99-1.19)         | 917           | 1.14 (1.03-1.26)         | 207              | 0.91 (0.75-1.11)         | 457           | 1.27 (1.09-1.47)         |
| Current 1-14<br>cigarettes/day             | 5669            | 124           | 1.78 (1.47-2.16)         | 94            | 1.74 (1.40-2.17)         | 31               | 1.88 (1.28-2.76)         | 35            | 1.57 (1.10-2.24)         |
| Current ≥15<br>cigarettes/day              | 7209            | 177           | 2.09 (1.76-2.47)         | 137           | 2.09 (1.73-2.54)         | 43               | 2.08 (1.47-2.95)         | 46            | 2.21 (1.60-3.04)         |
| <b>Alcohol consumption (g/day)</b>         |                 |               |                          |               |                          |                  |                          |               |                          |
| 0                                          | 81615           | 1286          | 1.00 (ref)               | 1015          | 1.00 (ref)               | 288              | 1.00 (ref)               | 555           | 1.00 (ref)               |
| 1.0-4.9                                    | 37982           | 533           | 0.89 (0.80-0.99)         | 423           | 0.86 (0.77-0.97)         | 116              | 0.99 (0.79-1.24)         | 163           | 0.82 (0.69-0.99)         |
| 5.0-14.9                                   | 18333           | 304           | 0.93 (0.81-1.06)         | 249           | 0.90 (0.78-1.05)         | 61               | 1.06 (0.79-1.41)         | 73            | 0.62 (0.48-0.80)         |
| ≥15.0                                      | 13035           | 188           | 0.73 (0.62-0.86)         | 157           | 0.71 (0.59-0.85)         | 33               | 0.78 (0.53-1.14)         | 67            | 0.81 (0.62-1.07)         |
| <b>Physical activity (hours/week)</b>      |                 |               |                          |               |                          |                  |                          |               |                          |
| 0                                          | 85436           | 1421          | 1.00 (ref)               | 1112          | 1.00 (ref)               | 326              | 1.00 (ref)               | 629           | 1.00 (ref)               |



|                                                     |       |     |                  |     |                  |     |                  |     |                  |
|-----------------------------------------------------|-------|-----|------------------|-----|------------------|-----|------------------|-----|------------------|
| 0.1-0.9                                             | 28895 | 396 | 0.94 (0.84-1.06) | 323 | 0.98 (0.86-1.11) | 78  | 0.82 (0.63-1.06) | 121 | 0.79 (0.65-0.97) |
| 1.0-3.4                                             | 14680 | 220 | 1.02 (0.88-1.18) | 183 | 1.05 (0.90-1.24) | 39  | 0.87 (0.62-1.23) | 46  | 0.65 (0.48-0.88) |
| ≥3.5                                                | 21955 | 274 | 0.87 (0.76-0.99) | 226 | 0.88 (0.75-1.02) | 55  | 0.86 (0.64-1.17) | 62  | 0.62 (0.47-0.82) |
| <b>Alternative healthy eating index (quintiles)</b> |       |     |                  |     |                  |     |                  |     |                  |
| Q 1                                                 | 31223 | 517 | 1.00 (ref)       | 400 | 1.00 (ref)       | 121 | 1.00 (ref)       | 213 | 1.00 (ref)       |
| Q 2                                                 | 30389 | 487 | 0.97 (0.86-1.11) | 397 | 1.02 (0.89-1.18) | 100 | 0.87 (0.66-1.13) | 188 | 0.97 (0.79-1.19) |
| Q 3                                                 | 30208 | 437 | 0.89 (0.79-1.02) | 348 | 0.91 (0.79-1.05) | 92  | 0.83 (0.63-1.09) | 168 | 0.90 (0.74-1.11) |
| Q 4                                                 | 30604 | 474 | 0.93 (0.82-1.06) | 379 | 0.96 (0.83-1.10) | 101 | 0.88 (0.67-1.15) | 158 | 0.84 (0.68-1.04) |
| Q 5                                                 | 28542 | 396 | 0.84 (0.74-0.97) | 320 | 0.87 (0.75-1.02) | 84  | 0.78 (0.59-1.04) | 131 | 0.77 (0.62-0.97) |
| <b>Number of low-risk factors‡</b>                  |       |     |                  |     |                  |     |                  |     |                  |
| None                                                | 2867  | 61  | 1.00 (ref)       | 50  | 1.00 (ref)       | 13  | 1.00 (ref)       | 19  | 1.00 (ref)       |
| One                                                 | 38714 | 621 | 0.68 (0.52-0.89) | 492 | 0.66 (0.49-0.88) | 134 | 0.69 (0.38-1.24) | 264 | 0.65 (0.40-1.04) |
| Two                                                 | 55463 | 849 | 0.58 (0.44-0.75) | 665 | 0.55 (0.41-0.74) | 196 | 0.63 (0.35-1.13) | 340 | 0.49 (0.30-0.78) |
| Three or more                                       | 53922 | 780 | 0.50 (0.38-0.65) | 637 | 0.49 (0.36-0.66) | 155 | 0.51 (0.28-0.92) | 235 | 0.32 (0.20-0.52) |

\* Time-varying variables (except BMI) were used in the model. Few patients (n=24) had BMI<18.5 kg/m<sup>2</sup> at diagnosis in the study. BMI: body mass index.

† Adjusted for age (years), sex (men or women), ethnicity (Caucasian, African American, Hispanic, or Asian), menopausal status (women only), family history of diabetes (yes/no), family history of myocardial infarction (yes/no), current aspirin use (yes/no), current multivitamin use (yes/no), and diabetes duration (years). Individual lifestyle factors were mutually adjusted.

‡ Low-risk lifestyle factors: 18.5≤BMI at diabetes diagnosis<25.0 kg/m<sup>2</sup>, non-smoking, moderate to vigorous physical activity (≥150 min/week), high quality diet (top two fifths of Alternative Healthy Eating Index), and moderate alcohol consumption (5-15 g/day for women and 5-30 g/day for men).

**Online Table 4.** Hazard ratio (95% CI) of CVD incidence and mortality according to different combinations of low-risk lifestyle factors after diabetes diagnosis\*

|                                                                                         | Person<br>Years | CVD Incidence |                  | CVD Mortality |                  |
|-----------------------------------------------------------------------------------------|-----------------|---------------|------------------|---------------|------------------|
|                                                                                         |                 | Cases         | HR† (95% CI)     | Cases         | HR† (95% CI)     |
| <b>Two low-risk factors</b> (high quality diet, moderate alcohol consumption) ‡         |                 |               |                  |               |                  |
| None                                                                                    | 74624           | 1198          | 1.00 (ref)       | 511           | 1.00 (ref)       |
| One or more                                                                             | 76902           | 1113          | 0.91 (0.84-1.00) | 347           | 0.81 (0.71-0.94) |
| <b>Three low-risk factors</b> (above two plus moderate to vigorous physical activity) ‡ |                 |               |                  |               |                  |
| None                                                                                    | 64810           | 1020          | 1.00 (ref)       | 442           | 1.00 (ref)       |
| One                                                                                     | 59962           | 918           | 0.94 (0.86-0.99) | 328           | 0.78 (0.68-0.90) |
| Two or more                                                                             | 26654           | 373           | 0.85 (0.75-0.96) | 88            | 0.53 (0.42-0.66) |
| <b>Four low-risk factors</b> (above three plus non-smoking) ‡                           |                 |               |                  |               |                  |
| None                                                                                    | 6443            | 148           | 1.00 (ref)       | 47            | 1.00 (ref)       |
| One                                                                                     | 63036           | 987           | 0.62 (0.52-0.74) | 442           | 0.63 (0.46-0.86) |
| Two                                                                                     | 56610           | 840           | 0.55 (0.46-0.66) | 294           | 0.46 (0.34-0.64) |
| Three or more                                                                           | 24877           | 336           | 0.48 (0.40-0.59) | 75            | 0.32 (0.22-0.47) |

\* Low-risk lifestyle factors:  $18.5 \leq \text{BMI}$  at diabetes diagnosis  $< 25.0 \text{ kg/m}^2$ , non-smoking, moderate to vigorous physical activity ( $\geq 150$  min/week), high quality diet (top two fifths of Alternative Healthy Eating Index), and moderate alcohol consumption (5-15 g/day for women and 5-30 g/day for men).

† Adjusted for age (years), sex (men or women), ethnicity (Caucasian, African American, Hispanic, or Asian), menopausal status (women only), family history of diabetes (yes/no), family history of myocardial infarction (yes/no), current aspirin use (yes/no), current multivitamin use (yes/no), and diabetes duration (years).

‡ Each lifestyle factor was further adjusted when they were not included in the low-risk lifestyle score.

**Online Table 5.** Hazard ratio (95% CI) of CVD incidence and mortality according to individual and combined lifestyle factors shortly before diabetes diagnosis

|                                       | Person<br>Years | CVD Incidence |                  | CHD Incidence |                  | Stroke Incidence |                  | CVD Mortality |                  |
|---------------------------------------|-----------------|---------------|------------------|---------------|------------------|------------------|------------------|---------------|------------------|
|                                       |                 | Cases         | HR* (95% CI)     | Cases         | HR* (95% CI)     | Cases            | HR* (95% CI)     | Cases         | HR* (95% CI)     |
| <b>BMI (kg/m<sup>2</sup>)</b>         |                 |               |                  |               |                  |                  |                  |               |                  |
| <25.0                                 | 23982           | 359           | 1.00 (ref)       | 256           | 1.00 (ref)       | 106              | 1.00 (ref)       | 146           | 1.00 (ref)       |
| 25.0-29.9                             | 52391           | 844           | 1.08 (0.95-1.23) | 702           | 1.22 (1.05-1.41) | 155              | 0.79 (0.61-1.02) | 287           | 0.94 (0.76-1.15) |
| 30.0-34.9                             | 40204           | 633           | 1.19 (1.04-1.37) | 520           | 1.33 (1.14-1.56) | 122              | 0.90 (0.69-1.18) | 214           | 1.22 (0.98-1.52) |
| ≥35.0                                 | 28705           | 392           | 1.21 (1.04-1.41) | 306           | 1.25 (1.04-1.49) | 89               | 1.19 (0.88-1.61) | 154           | 1.72 (1.35-2.19) |
| <b>Cigarette smoking</b>              |                 |               |                  |               |                  |                  |                  |               |                  |
| Never                                 | 65362           | 896           | 1.00 (ref)       | 695           | 1.00 (ref)       | 211              | 1.00 (ref)       | 315           | 1.00 (ref)       |
| Past                                  | 61204           | 898           | 1.05 (0.95-1.16) | 750           | 1.13 (1.01-1.26) | 160              | 0.81 (0.66-1.01) | 319           | 1.06 (0.90-1.26) |
| Current 1-14<br>cigarettes/day        | 6664            | 145           | 1.79 (1.49-2.14) | 120           | 1.93 (1.58-2.35) | 25               | 1.29 (0.84-1.97) | 41            | 1.70 (1.23-2.31) |
| Current ≥15<br>cigarettes/day         | 12053           | 289           | 1.91 (1.66-2.20) | 219           | 1.88 (1.60-2.21) | 76               | 2.08 (1.57-2.75) | 116           | 2.58 (2.07-3.22) |
| <b>Alcohol consumption (g/day)</b>    |                 |               |                  |               |                  |                  |                  |               |                  |
| 0                                     | 65999           | 996           | 1.00 (ref)       | 796           | 1.00 (ref)       | 210              | 1.00 (ref)       | 360           | 1.00 (ref)       |
| 1.0-4.9                               | 43891           | 675           | 0.96 (0.87-1.06) | 532           | 0.93 (0.83-1.04) | 153              | 1.14 (0.92-1.42) | 226           | 0.84 (0.71-1.00) |
| 5.0-14.9                              | 21614           | 336           | 0.83 (0.73-0.95) | 276           | 0.81 (0.70-0.93) | 66               | 0.98 (0.73-1.30) | 122           | 0.82 (0.66-1.03) |
| ≥15.0                                 | 13779           | 221           | 0.80 (0.68-0.94) | 180           | 0.77 (0.64-0.91) | 43               | 0.99 (0.70-1.41) | 83            | 0.85 (0.66-1.10) |
| <b>Physical activity (hours/week)</b> |                 |               |                  |               |                  |                  |                  |               |                  |

|                                                     |       |     |                  |     |                  |     |                  |     |                  |
|-----------------------------------------------------|-------|-----|------------------|-----|------------------|-----|------------------|-----|------------------|
| 0                                                   | 68326 | 971 | 1.00 (ref)       | 765 | 1.00 (ref)       | 212 | 1.00 (ref)       | 332 | 1.00 (ref)       |
| 0.1-0.9                                             | 35689 | 549 | 1.02 (0.91-1.14) | 442 | 1.06 (0.94-1.21) | 117 | 0.91 (0.71-1.16) | 217 | 1.23 (1.02-1.47) |
| 1.0-3.4                                             | 17153 | 301 | 1.23 (1.07-1.40) | 246 | 1.27 (1.09-1.47) | 60  | 1.12 (0.83-1.51) | 106 | 1.47 (1.17-1.83) |
| ≥3.5                                                | 24114 | 407 | 1.14 (0.99-1.29) | 331 | 1.17 (0.99-1.34) | 83  | 1.07 (0.82-1.40) | 146 | 1.18 (0.96-1.47) |
| <b>Alternative healthy eating index (quintiles)</b> |       |     |                  |     |                  |     |                  |     |                  |
| Q 1                                                 | 36232 | 533 | 1.00 (ref)       | 432 | 1.00 (ref)       | 106 | 1.00 (ref)       | 189 | 1.00 (ref)       |
| Q 2                                                 | 31295 | 482 | 1.01 (0.89-1.15) | 390 | 1.03 (0.89-1.18) | 97  | 0.97 (0.73-1.28) | 178 | 1.07 (0.86-1.31) |
| Q 3                                                 | 28442 | 458 | 1.05 (0.92-1.19) | 374 | 1.06 (0.92-1.22) | 88  | 1.01 (0.76-1.35) | 155 | 0.95 (0.76-1.18) |
| Q 4                                                 | 26501 | 439 | 1.09 (0.95-1.24) | 345 | 1.05 (0.91-1.22) | 100 | 1.24 (0.94-1.65) | 157 | 1.02 (0.82-1.27) |
| Q 5                                                 | 22815 | 316 | 0.88 (0.76-1.02) | 243 | 0.84 (0.71-0.99) | 81  | 1.12 (0.83-1.51) | 122 | 0.96 (0.76-1.22) |
| <b>Number of low-risk factors†</b>                  |       |     |                  |     |                  |     |                  |     |                  |
| None                                                | 3375  | 77  | 1.00 (ref)       | 60  | 1.00 (ref)       | 18  | 1.00 (ref)       | 32  | 1.00 (ref)       |
| One                                                 | 38054 | 588 | 0.75 (0.58-0.96) | 467 | 0.76 (0.57-1.02) | 127 | 0.68 (0.41-1.13) | 203 | 0.58 (0.40-0.85) |
| Two                                                 | 52169 | 758 | 0.61 (0.47-0.78) | 618 | 0.64 (0.48-0.85) | 147 | 0.50 (0.30-0.82) | 285 | 0.45 (0.31-0.65) |
| Three or more                                       | 51687 | 805 | 0.59 (0.46-0.76) | 639 | 0.58 (0.44-0.79) | 180 | 0.60 (0.36-0.98) | 281 | 0.39 (0.27-0.56) |

\* Adjusted for age (years), sex (men or women), ethnicity (Caucasian, African American, Hispanic, or Asian), menopausal status (women only), family history of diabetes (yes/no), family history of myocardial infarction (yes/no), current aspirin use (yes/no), current multivitamin use (yes/no), and diabetes duration (years). Individual lifestyle factors were mutually adjusted. BMI: body mass index.

† Low-risk lifestyle factors before diabetes diagnosis:  $18.5 \leq \text{BMI} < 25.0 \text{ kg/m}^2$ , non-smoking, moderate to vigorous physical activity ( $\geq 150$  min/week), high quality diet (top two fifths of Alternative Healthy Eating Index), and moderate alcohol consumption (5-15 g/day for women and 5-30 g/day for men).
